# Supplementary material for: Care by Midwives, Obstetricians, and Dietitians for Pregnant Women Following a Strict Plant-Based Diet: A Cross-Sectional Study
Source: MDPI journal article supplement (doi:10.3390/nu13072394), 2021-07-13
Supplement: s1 [file s1]

## Supporting information S2 – Questionnaire dieticians.

1. What is your age?
  - a. <30
  - b. 31-40
  - c. 41-50
  - d. >50
2. How many years do you work as a dietician?
3. Describe your job as a dietician, multiple answers are possible:
  - a. Dietician in a first-line dietician practice
  - b. Dietician active in nursing or home care
  - c. Dietician active in education or training institutions
  - d. Dietician active in mental healthcare
  - e. Dietician working with (mentally) disabled people
  - f. Dietician active in the rehabilitation care
  - g. Dietician active in the youth assistance
  - h. Dietician active in the addiction care
  - i. Lifestyle advisor
  - j. Sport dietician
  - k. Business dietician
  - l. School dietician
  - m. Research dietician
  - n. Other...
4. In which area in the Netherlands do you work?
  - a. Groningen
  - b. Drenthe
  - c. Flevoland
  - d. Noord-Holland
  - e. Overijssel
  - f. Zuid-Holland
  - g. Utrecht
  - h. Gelderland
  - i. Zeeland
  - j. Noord-Brabant
  - k. Limburg

Important note: A vegan diet is a diet excludes all animal products, e.g. meat, fish, eggs or dairy products. The following questions are about a **vegan** diet, not a vegetarian diet.

5. Did you receive any education regarding pregnancy and a vegan diet in your program?
  - a. Yes
  - b. No
  - c. No, but I did learn about a vegetarian diet during pregnancy
6. Have you followed an additional course about nutrition during pregnancy?
  - a. Yes, this included advice about a vegan diet during pregnancy
  - b. Yes, this included **only** advice about a vegetarian diet during pregnancy
  - c. Yes, but this did **not** cover a vegetarian or a vegan diet during pregnancy
  - d. No
7. Statement: I think I have sufficient knowledge to advise pregnant women on a vegan diet during pregnancy:

- a. I agree
  - b. I don't know
  - c. I disagree
8. Have you seen a pregnant woman on a vegan diet in the last year?
- a. Yes, >10 times
  - b. Yes, 5-10 times
  - c. Yes, 0-4 times
  - d. No
9. Were these women referred by a professional?
- a. No, these women come on their own initiative
  - b. Yes, these women were referred by a obstetrician
  - c. Yes, these women were referred by a midwife
  - d. Yes, these women were referred by another dietician
  - e. Yes, these women were referred by a general practitioner
  - f. Yes, these women were referred by information of the website of the *Voedingscentrum*
  - g. Other...
10. When you want to look up information about a vegan diet in pregnancy, where would you search?
- a. *Voedingscentrum*
  - b. The Dutch magazine for nutrition and dietetics
  - c. Colleagues
  - d. Other...
11. When do you think women with a vegan diet should get information or advise?
- a. When they have an active wish to have children
  - b. During their pregnancy
  - c. It is not necessary
12. Do you want to learn more about a vegan diet during pregnancy?
- a. Yes
  - b. No
13. What type of education would you prefer to raise the awareness of dieticians for pregnant women on a vegan diet?
- a. A lecture during congresses for healthcare professionals
  - b. A course
  - c. A national protocol
  - d. I do not think this is necessary
